# Supplementary material for: Flax, Basalt, E-Glass FRP and Their Hybrid FRP Strengthened Wood Beams: An Experimental Study
Source: MDPI journal article supplement (doi:10.3390/polym11081255), 2019-07-29
Supplement: s1 [file s1]

## Supplementary Materials

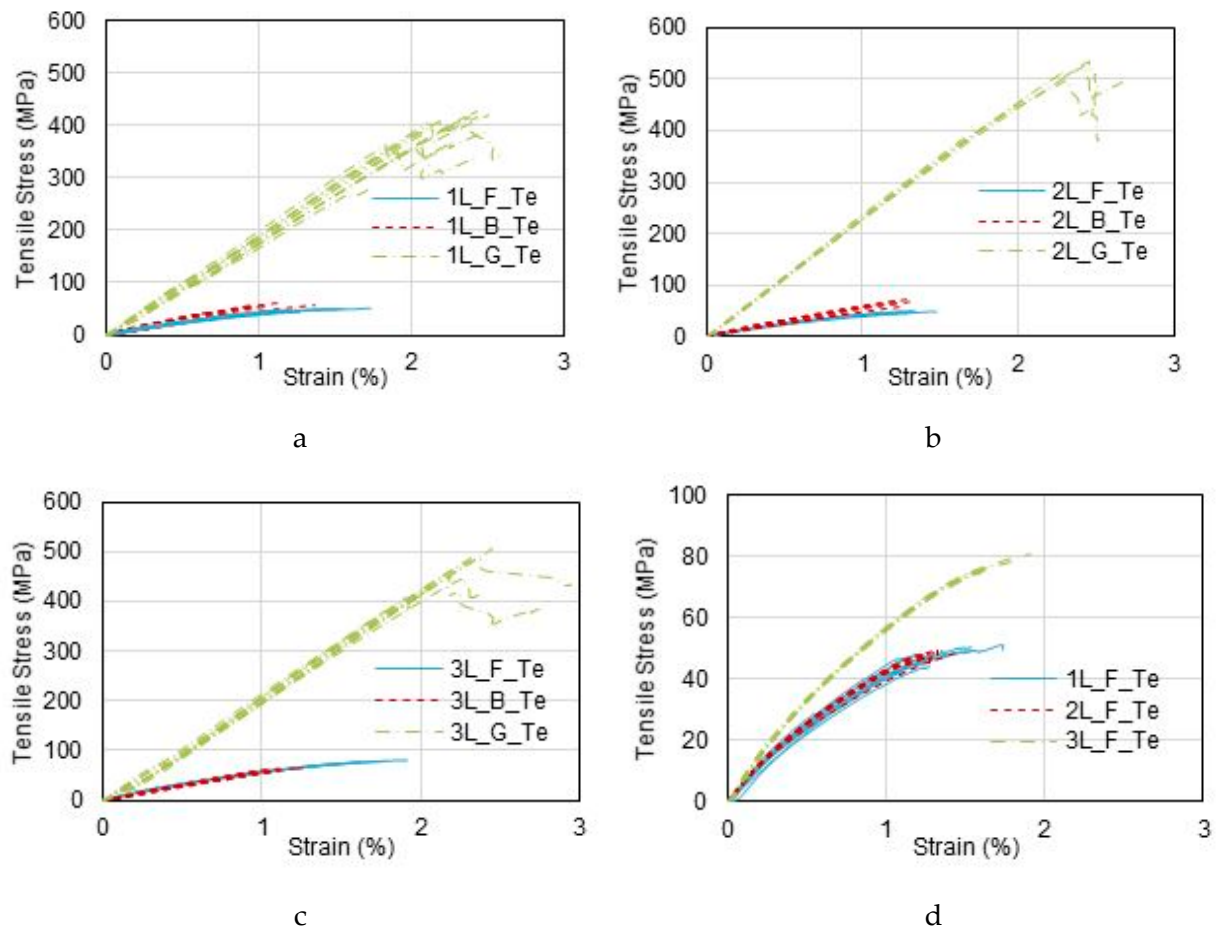

**Figure S1** Stress-strain curve of flat coupon tensile test for (a) 1-layer; (b) 2-layer and (c) 3-layer FRP as well as (d) the layer effect of FFRP

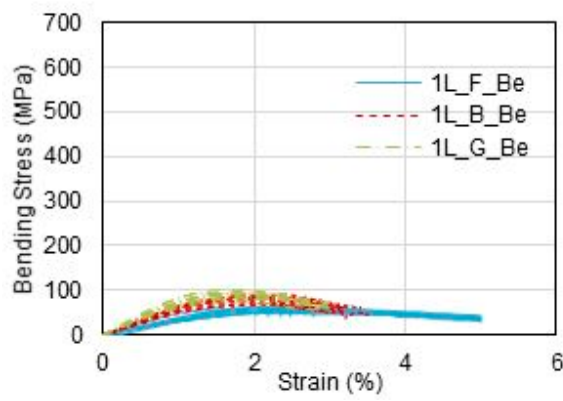

a

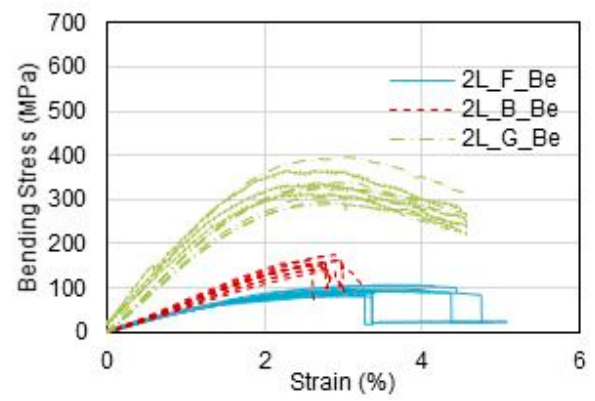

b

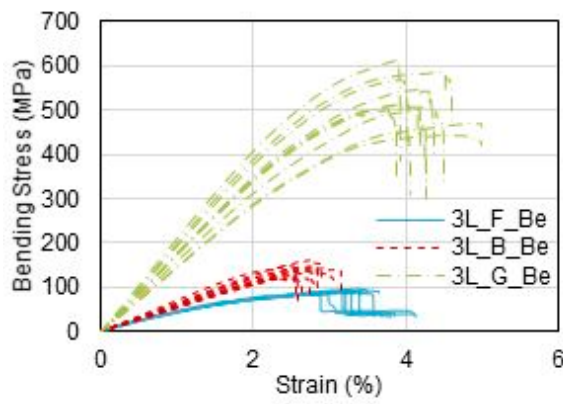

c

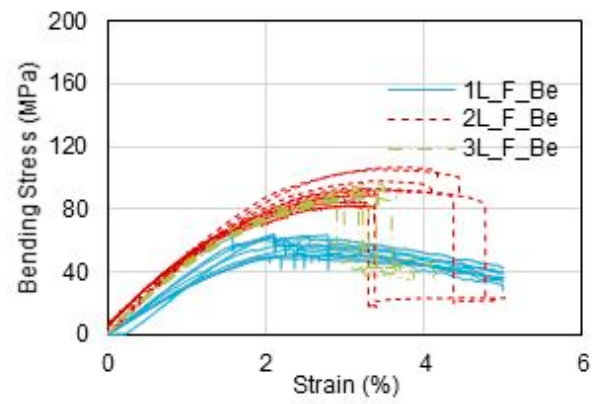

d

**Figure S2 Stress-strain curve of standard bending test for (a) 1-layer; (b) 2-layer and (c) 3-layer FRP as well as (d) the layer effect of FFRP**

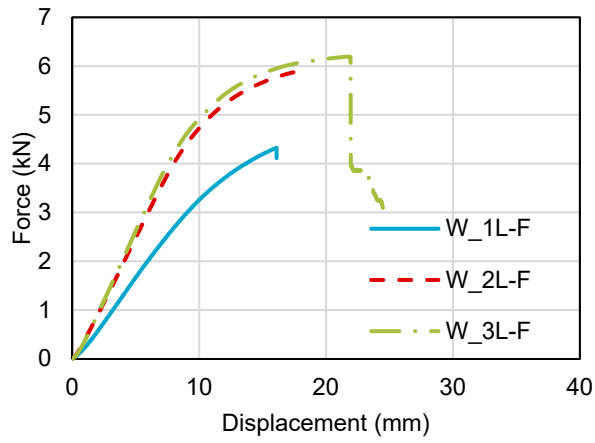

a

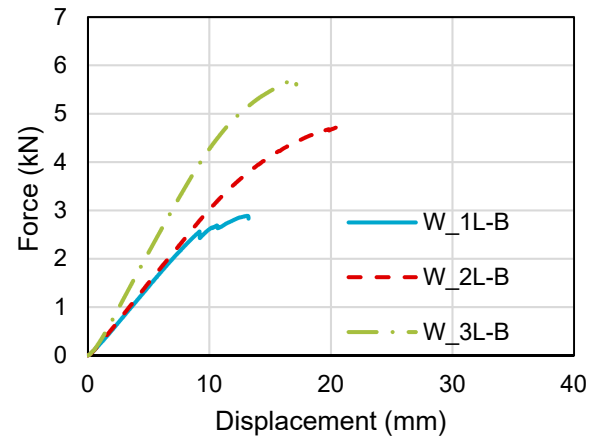

b

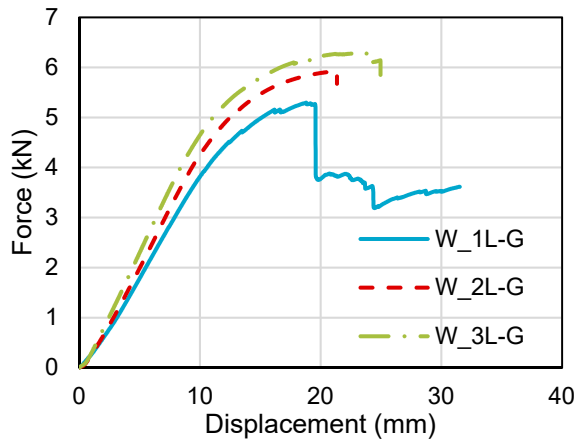

c

**Figure S3 Load-displacement curves of FRP strengthened wood beams with different FRP fabric materials: (a) FFRP, (b) BFRP and (c) GFRP**
